# Supplementary material for: Validity of the FINDRISC as a prediction tool for diabetes in a contemporary Norwegian population: a 10-year follow-up of the HUNT study
Source: PubMed Central journal article supplement (PMC6887494; doi:10.1136/bmjdrc-2019-000769), 2019-11-28
Supplement: bmjdrc-2019-000769supp001.pdf [file bmjdrc-2019-000769supp001.pdf]

**ESM Table 1.** Sensitivity analyses using different criteria for medically treated diabetes among women <45 years at baseline.

| Definition of diabetes among women <45 ys at baseline                                                                   | No. diabetes/total among women <45 ys at baseline                                   |              | 10-year diabetes incidence (% , 95% CI) among women <45 ys at baseline |                    | 10-year diabetes incidence (% , 95% CI) in the entire study population |                     |
|-------------------------------------------------------------------------------------------------------------------------|-------------------------------------------------------------------------------------|--------------|------------------------------------------------------------------------|--------------------|------------------------------------------------------------------------|---------------------|
|                                                                                                                         | FINDRISC <15                                                                        | FINDRISC ≥15 | FINDRISC <15                                                           | FINDRISC ≥15       | FINDRISC <15                                                           | FINDRISC ≥15        |
|                                                                                                                         | Any dispensing of glucose-lowering medication after HUNT3 (as in the main analysis) | 140/8753     | 29/213                                                                 | 1.8<br>(1.5-2.1)   | 14.7<br>(9.9-20.4)                                                     | 2.8<br>(2.6-3.0)    |
| Any dispensing of glucose-lowering medication after HUNT3 except dispensing of metformin only                           | 55/8753                                                                             | 18/213       | 0.6<br>(0.5-0.8)                                                       | 8.7<br>(5.3-13.0)  | 2.6<br>(2.4-2.8)                                                       | 13.2<br>(12.3-14.2) |
| Any dispensing of glucose-lowering medication after HUNT3 as long as the time from first to last dispensing was ≥1 year | 65/8753                                                                             | 21/213       | 0.7<br>(0.6-0.9)                                                       | 10.0<br>(6.4-14.4) | 2.6<br>(2.4-2.8)                                                       | 13.3<br>(12.3-14.3) |

**ESM Table 2.** Updating of FINDRISC by re-estimating the scores of the individual FINDRISC components in the current study population.

| Variable                                                       | Value                                     | $\beta$ | 95% CI    | <i>P</i> | Score<br>( $\beta=0.15$<br>corresponds<br>to 1 point) |
|----------------------------------------------------------------|-------------------------------------------|---------|-----------|----------|-------------------------------------------------------|
| Age, years                                                     | <45                                       | 0       | Reference |          | 0                                                     |
|                                                                | 45-54                                     | 0.32    | 0.16-0.47 | <0.001   | 2                                                     |
|                                                                | 55-64                                     | 0.61    | 0.46-0.76 | <0.001   | 4                                                     |
|                                                                | $\geq 65$                                 | 0.55    | 0.39-0.71 | <0.001   | 4                                                     |
| BMI, kg/m <sup>2</sup>                                         | <25                                       | 0       | Reference |          | 0                                                     |
|                                                                | 25-30                                     | 0.53    | 0.32-0.73 | <0.001   | 4                                                     |
|                                                                | >30                                       | 1.31    | 1.09-1.53 | <0.001   | 9                                                     |
| Waist<br>circumference,<br>cm                                  | Men <94<br>Women <80                      | 0       | Reference |          | 0                                                     |
|                                                                | Men 94-102<br>Women 80-88                 | 0.35    | 0.13-0.56 | 0.002    | 2                                                     |
|                                                                | Men >102<br>Women >88                     | 1.00    | 0.78-1.22 | <0.001   | 7                                                     |
|                                                                | Physical<br>activity $\geq 30$<br>min/day | 0       | Reference |          | 0                                                     |
| Daily<br>consumption<br>of fruits,<br>berries or<br>vegetables | No                                        | 0.15    | 0.05-0.26 | 0.004    | 1                                                     |
|                                                                | Yes                                       | 0       | Reference |          | 0                                                     |
| Ever regular<br>use of anti-<br>hypertensive<br>medication     | No                                        | 0.16    | 0.07-0.26 | 0.001    | 1                                                     |
|                                                                | No                                        | 0       | Reference |          | 0                                                     |
| History of<br>high blood<br>glucose<br>measurement             | Yes                                       | 0.49    | 0.38-0.60 | <0.001   | 3                                                     |
|                                                                | No                                        | 0       | Reference |          | 0                                                     |
| Family history<br>of diabetes                                  | Yes                                       | 1.14    | 1.01-1.28 | <0.001   | 8                                                     |
|                                                                | No                                        | 0       | Reference |          | 0                                                     |
|                                                                | 2nd but no 1st<br>degree<br>relative      | 0.20    | 0.06-0.34 | 0.006    | 1                                                     |
| Sex                                                            | 1st degree<br>relative                    | 0.66    | 0.56-0.76 | <0.001   | 4                                                     |
|                                                                | Woman                                     | 0       | Reference |          | 0                                                     |
|                                                                | Man                                       | 0.62    | 0.52-0.73 | <0.001   | 4                                                     |

**ESM Table 3.** Sensitivity and specificity of the updated<sup>a</sup> FINDRISC in predicting future diabetes<sup>b</sup> among 47,804 participants of HUNT3 followed up from 2006-08 through 2016, displayed for each possible cut-off value for the updated FINDRISC score, overall and by sex.

| Definition of elevated FINDRISC score | Overall         |                 | Women           |                 | Men             |                 |
|---------------------------------------|-----------------|-----------------|-----------------|-----------------|-----------------|-----------------|
|                                       | Sensitivity (%) | Specificity (%) | Sensitivity (%) | Specificity (%) | Sensitivity (%) | Specificity (%) |
| ≥1                                    | 99.94           | 2               | 99.9            | 3               | -               | -               |
| ≥2                                    | 99.8            | 4               | 99.5            | 6               | -               | -               |
| ≥3                                    | 99.7            | 6               | 99.4            | 11              | -               | -               |
| ≥4                                    | 99.5            | 8               | 99              | 15              | -               | -               |
| ≥5                                    | 99              | 12              | 98              | 20              | 100             | 2               |
| ≥6                                    | 99              | 16              | 98              | 24              | 99.6            | 6               |
| ≥7                                    | 98              | 20              | 96              | 29              | 99.3            | 10              |
| ≥8                                    | 97              | 23              | 95              | 33              | 99              | 12              |
| ≥9                                    | 97              | 28              | 94              | 37              | 98              | 17              |
| ≥10                                   | 96              | 32              | 94              | 40              | 97              | 23              |
| ≥11                                   | 95              | 36              | 93              | 43              | 96              | 28              |
| ≥12                                   | 93              | 42              | 92              | 48              | 94              | 34              |
| ≥13                                   | 91              | 47              | 90              | 52              | 92              | 41              |
| ≥14                                   | 89              | 52              | 88              | 56              | 90              | 47              |
| ≥15                                   | 86              | 56              | 86              | 59              | 86              | 53              |
| ≥16                                   | 83              | 61              | 82              | 64              | 83              | 58              |
| ≥17                                   | 79              | 66              | 79              | 69              | 80              | 62              |
| ≥18                                   | 75              | 70              | 73              | 72              | 77              | 66              |
| ≥19                                   | 71              | 74              | 68              | 77              | 73              | 70              |
| ≥20                                   | 66              | 78              | 62              | 81              | 70              | 74              |
| ≥21                                   | 61              | 81              | 55              | 85              | 66              | 77              |
| ≥22                                   | 57              | 84              | 51              | 88              | 61              | 80              |
| ≥23                                   | 51              | 87              | 45              | 89              | 56              | 84              |
| ≥24                                   | 46              | 90              | 39              | 92              | 51              | 86              |
| ≥25                                   | 38              | 93              | 29              | 95              | 45              | 89              |
| ≥26                                   | 32              | 94              | 24              | 97              | 38              | 92              |
| ≥27                                   | 28              | 95              | 21              | 97              | 33              | 93              |
| ≥28                                   | 22              | 97              | 17              | 98              | 26              | 95              |
| ≥29                                   | 15              | 98              | 12              | 99              | 18              | 97              |
| ≥30                                   | 13              | 99              | 10              | 99.1            | 15              | 98              |
| ≥31                                   | 11              | 99              | 8               | 99.3            | 13              | 98              |
| ≥32                                   | 8               | 99.2            | 6               | 99.5            | 10              | 99              |
| ≥33                                   | 5               | 99.5            | 4               | 99.7            | 7               | 99.3            |
| ≥34                                   | 4               | 99.7            | 2               | 99.8            | 6               | 99.5            |
| ≥35                                   | 3               | 99.7            | 1               | 99.8            | 5               | 99.5            |
| ≥36                                   | 2               | 99.8            | 1               | 99.94           | 3               | 99.7            |
| ≥37                                   | 1               | 99.9            | 0.5             | 100             | 2               | 99.8            |
| ≥38                                   | 0.8             | 99.93           | -               | -               | 1               | 99.8            |
| ≥39                                   | 0.7             | 99.93           | -               | -               | 1               | 99.9            |
| ≥40                                   | 0.5             | 99.97           | -               | -               | 0.9             | 99.93           |
| 41                                    | 0.1             | 99.98           | -               | -               | 0.2             | 99.97           |

<sup>a</sup> by re-estimating the scores of the individual FINDRISC components in the current study population

<sup>b</sup> as indicated by dispensing of glucose-lowering medication recorded in the Norwegian Prescription Database

**ESM Table 4.** 10-year cumulative incidence of diabetes<sup>a</sup> among 47,804 participants of the HUNT3 Survey according to updated<sup>b</sup> FINDRISC score < vs.  $\geq 18$  out of 41 at HUNT3, overall and by categories of sex and age at HUNT3.

| Sex   | Age (years) | Updated FINDRISC | No. people | No. diabetes | 10-year cumulative incidence (%; 95% CI) |
|-------|-------------|------------------|------------|--------------|------------------------------------------|
| Any   | Any         | Any              | 47,804     | 1761         | 4.0 (3.8-4.2)                            |
| Any   | Any         | <18              | 32,480     | 434          | 1.5 (1.4-1.7)                            |
| Any   | Any         | $\geq 18$        | 15,324     | 1327         | 9.2 (8.7-9.7)                            |
| Women | <45         | <18              | 7989       | 88           | 1.3 (1.0-1.6)                            |
| Women | 45-54       | <18              | 4183       | 37           | 1.0 (0.7-1.4)                            |
| Women | 55-64       | <18              | 3346       | 44           | 1.5 (1.1-2.1)                            |
| Women | 65-74       | <18              | 1858       | 27           | 1.6 (1.1-2.3)                            |
| Women | $\geq 75$   | <18              | 1210       | 19           | 1.6 (1.0-2.4)                            |
| Women | <45         | $\geq 18$        | 977        | 81           | 8.8 (7.0-10.9)                           |
| Women | 45-54       | $\geq 18$        | 1415       | 98           | 7.7 (6.1-9.6)                            |
| Women | 55-64       | $\geq 18$        | 2292       | 193          | 9.2 (7.9-10.5)                           |
| Women | 65-74       | $\geq 18$        | 1648       | 127          | 8.1 (6.7-9.7)                            |
| Women | $\geq 75$   | $\geq 18$        | 1266       | 77           | 6.1 (4.9-7.5)                            |
| Men   | <45         | <18              | 5577       | 37           | 0.9 (0.5-1.6)                            |
| Men   | 45-54       | <18              | 3202       | 53           | 2.0 (1.4-2.6)                            |
| Men   | 55-64       | <18              | 2623       | 64           | 2.7 (2.0-3.4)                            |
| Men   | 65-74       | <18              | 1591       | 45           | 3.0 (2.2-4.0)                            |
| Men   | $\geq 75$   | <18              | 901        | 20           | 2.2 (1.4-3.3)                            |
| Men   | <45         | $\geq 18$        | 1237       | 98           | 8.8 (7.0-10.9)                           |
| Men   | 45-54       | $\geq 18$        | 1516       | 158          | 11.0 (9.4-12.8)                          |
| Men   | 55-64       | $\geq 18$        | 2490       | 262          | 11.1 (9.8-12.4)                          |
| Men   | 65-74       | $\geq 18$        | 1540       | 155          | 10.4 (8.9-12.0)                          |
| Men   | $\geq 75$   | $\geq 18$        | 943        | 78           | 8.6 (6.8-10.6)                           |

<sup>a</sup> as indicated by dispensing of glucose-lowering medication recorded in the Norwegian Prescription Database

<sup>b</sup> by re-estimating the scores of the individual FINDRISC components in the current study population
